# Supplementary material
Source: PubMed Central journal article supplement (PMC9458541)

# The Burden of Community-Acquired Pneumonia Requiring Admission to ICU in the United States

*Rodrigo Cavallazzi, MD; Stephen Furmanek, MS; Forest W. Arnold, DO;  
Leslie A. Beavin, MD; Richard G. Wunderink, MD; Michael S. Niederman, MD; and  
Julio A. Ramirez, MD*

CHEST 2020; 158(3):1008-1016

*Online supplements are not copyedited prior to posting and the author(s) take full responsibility for the accuracy of all data.*

© 2020 AMERICAN COLLEGE OF CHEST PHYSICIANS. Reproduction of this article is prohibited without written permission from the American College of Chest Physicians. See online for more details. DOI: 10.1016/j.chest.2020.03.051

**e-Table 1.** Characteristics of Alive and Deceased Patients at 30 days

| <b>Total Study Population</b>                              | <b>Alive at 30 days</b> | <b>Deceased at 30 days</b> | <b>P</b> |
|------------------------------------------------------------|-------------------------|----------------------------|----------|
| No.                                                        | 1220                    | 459                        |          |
| <b>Demographics and Hospitalization</b>                    |                         |                            |          |
| Age at hospitalization, Median[IQR]                        | 65 [55, 75]             | 73 [63, 83]                | <0.001   |
| Male sex, Frequency(%)                                     | 613 (50)                | 253 (55)                   | 0.641    |
| Black race, Frequency(%)                                   | 254 (21)                | 74 (16)                    | 0.349    |
| Late ICU admission, Frequency(%)                           | 287 (24)                | 140 (31)                   | 0.044    |
| <b>Social and Medical History, Frequency(%)</b>            |                         |                            |          |
| Chronic obstructive pulmonary disease                      | 637 (52)                | 205 (45)                   | 0.073    |
| Renal disease                                              | 453 (37)                | 222 (48)                   | <0.001   |
| Diabetes mellitus                                          | 465 (38)                | 160 (35)                   | >0.999   |
| Congestive heart failure                                   | 441 (36)                | 184 (40)                   | >0.999   |
| Obese                                                      | 469 (38)                | 126 (28)                   | <0.001   |
| Current smoker                                             | 484 (40)                | 107 (23)                   | <0.001   |
| Stroke                                                     | 176 (14)                | 64 (14)                    | >0.999   |
| Neoplastic disease                                         | 119 (10)                | 107 (23)                   | <0.001   |
| Chronic renal failure                                      | 118 (10)                | 49 (11)                    | >0.999   |
| HIV disease                                                | 14 (1)                  | 6 (1)                      | >0.999   |
| <b>Physical Exam Findings, Median[IQR]</b>                 |                         |                            |          |
| Altered mental status, Frequency (%)                       | 405 (33)                | 203 (44)                   | 0.002    |
| Heart rate (Beats/Minute)                                  | 113 [98, 128]           | 112 [97, 131]              | >0.999   |
| Respiratory rate (Breaths/Minute)                          | 28 [23, 33]             | 27 [23, 34]                | >0.999   |
| Systolic blood pressure (mmHg)                             | 102 [87, 126]           | 97 [84, 116]               | 0.001    |
| Diastolic blood pressure (mmHg)                            | 51 [42, 61]             | 48 [39, 58]                | <0.001   |
| Temperature (Degrees Celsius)                              | 37 [37, 38]             | 37 [37, 38]                | 0.008    |
| <b>Laboratory &amp; Radiographic Findings, Median[IQR]</b> |                         |                            |          |
| Hematocrit (percent)                                       | 35 [30, 40]             | 34 [29, 38]                | 0.015    |
| Serum bicarbonate (mEq/L)                                  | 26 [22, 30]             | 25 [20, 29]                | 0.117    |
| Blood urea nitrogen (mg/dL)                                | 23 [15, 35]             | 32 [21, 48]                | <0.001   |
| Serum glucose (mg/dl)                                      | 162 [126, 227]          | 159 [128, 218]             | >0.999   |
| Serum sodium (mEq/L)                                       | 137 [134, 140]          | 137 [133, 140]             | >0.999   |
| Pleural Effusion, Frequency (%)                            | 454 (37)                | 203 (44)                   | 0.316    |
| <b>Ventilatory Support and Vasopressors, Frequency(%)</b>  |                         |                            |          |
| Invasive mechanical ventilatory support                    | 292 (24)                | 111 (24)                   | >0.999   |
| Non-invasive mechanical ventilatory support                | 247 (20)                | 98 (21)                    | >0.999   |
| Vasopressors                                               | 105 (9)                 | 82 (18)                    | <0.001   |
| <b>Severity of Disease, Frequency(%)</b>                   |                         |                            |          |
| PSI Risk Class IV/V                                        | 1007 (83)               | 425 (93)                   | <0.001   |
| CURB-65 Score                                              | 282 (23)                | 189 (41)                   | <0.001   |

**e-Table 2.** Characteristics of Alive and Deceased Patients at 1 year

| <b>Total Study Population</b>                              | <b>Alive at 1 year</b> | <b>Deceased at 1 year</b> | <b>P</b> |
|------------------------------------------------------------|------------------------|---------------------------|----------|
| No.                                                        | 890                    | 779                       |          |
| <b>Demographics and Hospitalization</b>                    |                        |                           |          |
| Age at hospitalization, Median[IQR]*                       | 62 [52, 73]            | 72 [62, 82]               | <0.001   |
| Male sex, Frequency(%)                                     | 432 (49)               | 429 (55)                  | 0.001    |
| Black race, Frequency(%)                                   | 186 (21)               | 140 (18)                  | >0.999   |
| Late ICU admission, Frequency(%)                           | 210 (24)               | 216 (28)                  | 0.371    |
| <b>Social and Medical History, Frequency(%)</b>            |                        |                           |          |
| Chronic obstructive pulmonary disease                      | 441 (50)               | 394 (51)                  | >0.999   |
| Renal disease                                              | 315 (35)               | 358 (46)                  | <0.001   |
| Diabetes mellitus                                          | 318 (36)               | 301 (39)                  | >0.999   |
| Congestive heart failure                                   | 289 (32)               | 329 (42)                  | <0.001   |
| Obese                                                      | 359 (40)               | 230 (30)                  | <0.001   |
| Current smoker                                             | 387 (43)               | 203 (26)                  | <0.001   |
| Stroke                                                     | 123 (14)               | 115 (15)                  | >0.999   |
| Neoplastic disease                                         | 53 (6)                 | 169 (22)                  | <0.001   |
| Chronic renal failure                                      | 68 (8)                 | 98 (13)                   | <0.001   |
| HIV disease                                                | 11 (1)                 | 9 (1)                     | >0.999   |
| <b>Physical Exam Findings, Median[IQR]</b>                 |                        |                           |          |
| Altered mental status, Frequency (%)                       | 290 (33)               | 313 (40)                  | 0.002    |
| Heart rate (Beats/Minute)                                  | 114 [98, 128]          | 112 [96, 130]             | >0.999   |
| Respiratory rate (Breaths/Minute)                          | 28 [23, 33]            | 28 [23, 34]               | >0.999   |
| Systolic blood pressure (mmHg)                             | 103 [87, 126]          | 99 [85, 120]              | 0.324    |
| Diastolic blood pressure (mmHg)                            | 51 [42, 62]            | 49 [40, 58]               | 0.035    |
| Temperature (Degrees Celsius)                              | 37 [37, 38]            | 37 [37, 38]               | 0.056    |
| <b>Laboratory &amp; Radiographic Findings, Median[IQR]</b> |                        |                           |          |
| Hematocrit (percent)                                       | 36 [31, 41]            | 34 [29, 38]               | <0.001   |
| Serum bicarbonate (mEq/L)                                  | 25 [22, 29]            | 26 [21, 30]               | >0.999   |
| Blood urea nitrogen (mg/dL)                                | 22 [14, 34]            | 29 [18, 45]               | >0.999   |
| Serum glucose (mg/dl)                                      | 162 [127, 229]         | 159 [126, 222]            | >0.999   |
| Serum sodium (mEq/L)                                       | 137 [134, 140]         | 137 [133, 140]            | >0.999   |
| Pleural Effusion, Frequency (%)                            | 313 (35)               | 343 (44)                  | 0.070    |
| <b>Ventilatory Support and Vasopressors, Frequency(%)</b>  |                        |                           |          |
| Invasive mechanical ventilatory support                    | 209 (23)               | 192 (25)                  | >0.999   |
| Non-invasive mechanical ventilatory support                | 171 (19)               | 173 (22)                  | 0.256    |
| Vasopressors                                               | 78 (9)                 | 107 (14)                  | 0.015    |
| <b>Severity of Disease, Frequency(%)</b>                   |                        |                           |          |
| PSI Risk Class IV/V                                        | 699 (79)               | 723 (93)                  | <0.001   |
| CURB-65 Score                                              | 176 (20)               | 290 (37)                  | <0.001   |

**e-Figure 1.** Incidence of community-acquired pneumonia requiring hospitalization (All) compared to the incidence of community-acquired pneumonia requiring admission to intensive care (ICU) according to age brackets.

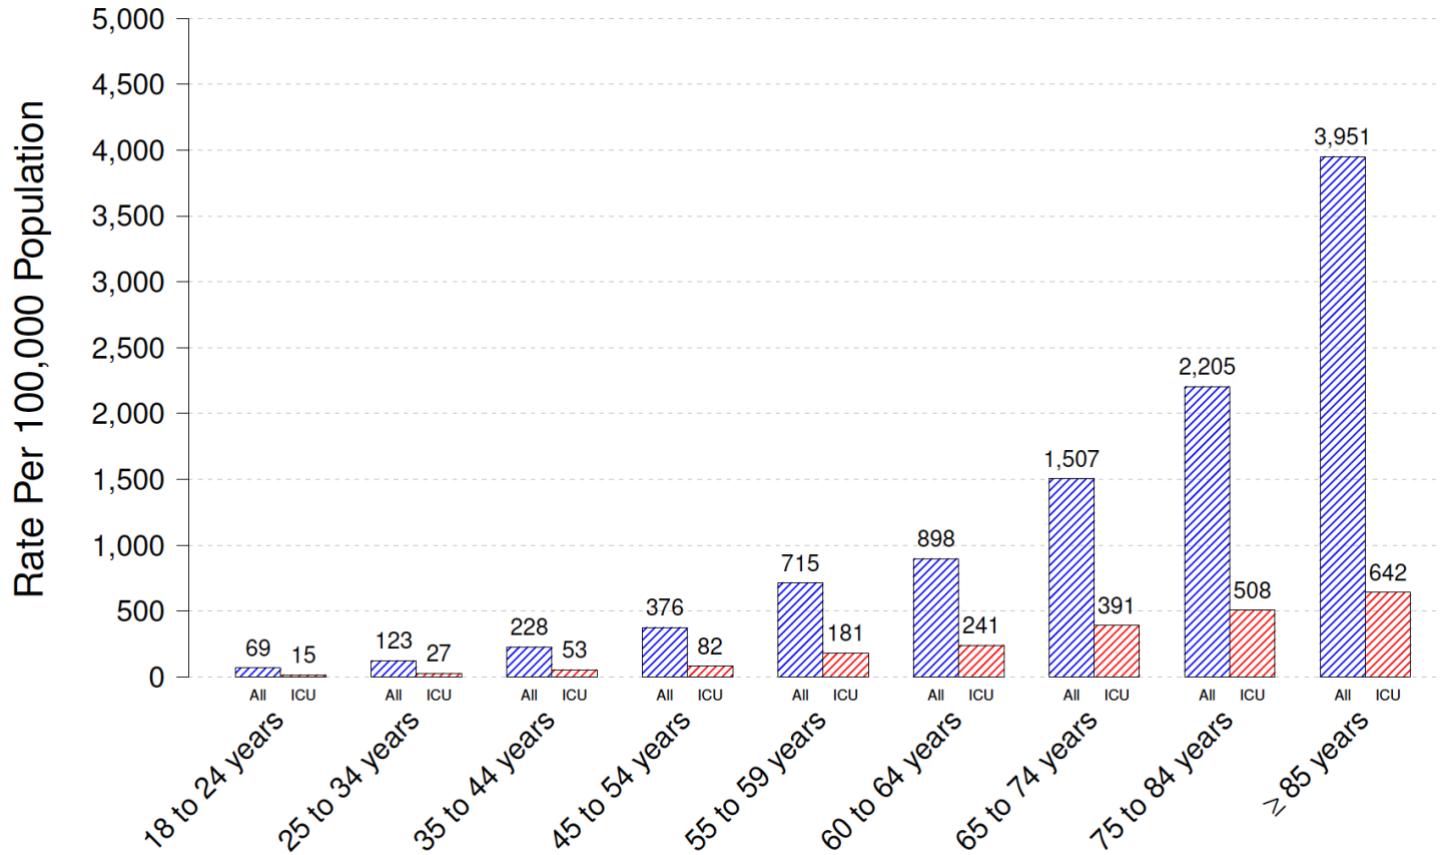

**e-Figure 2.** Incidence of community-acquired pneumonia requiring admission to intensive care unit according to presence of co-morbidities.

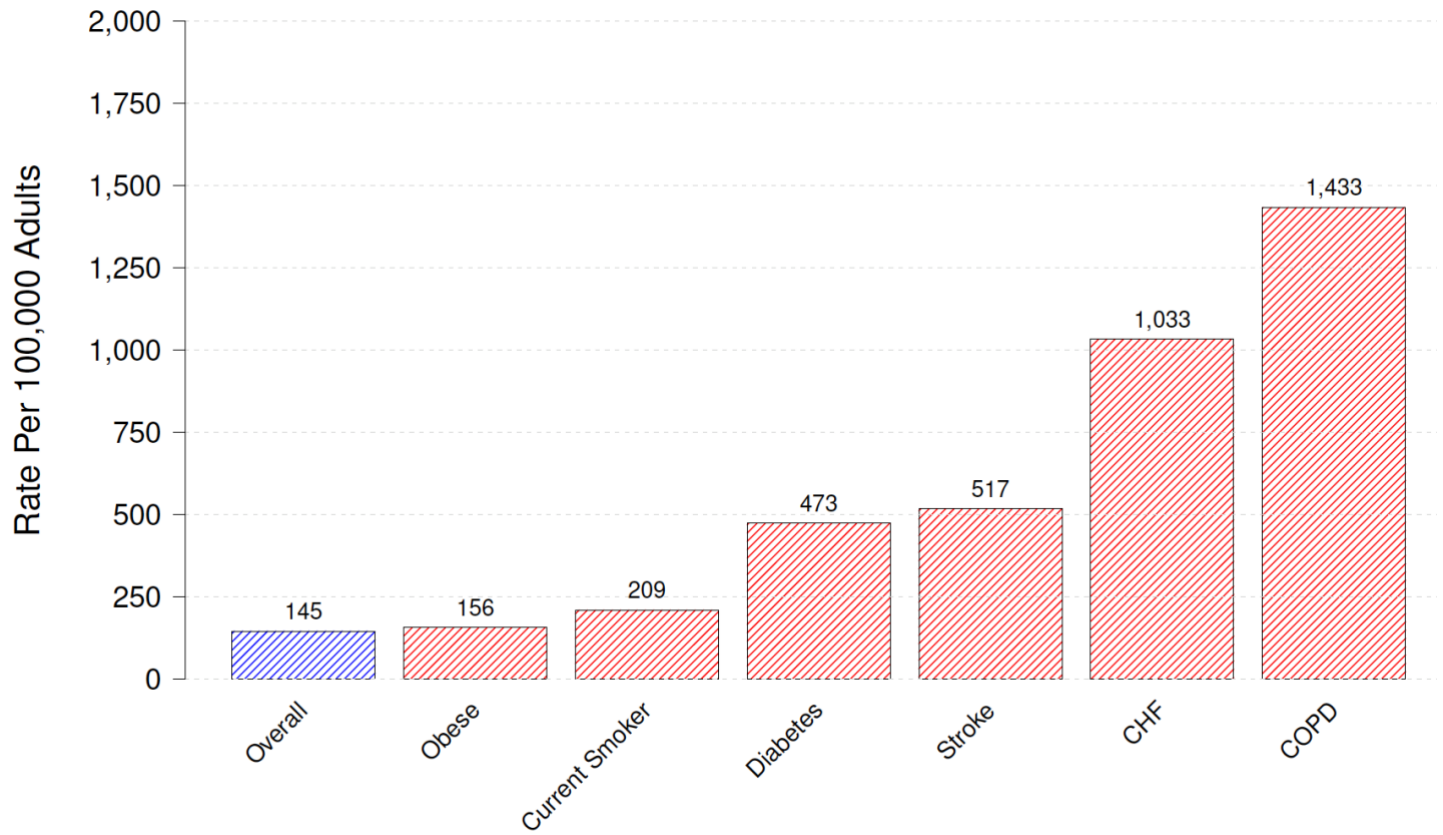

**e-Figure 3.** Kaplan-Meier curves comparing early and late ICU admission for survival estimates up to one year.

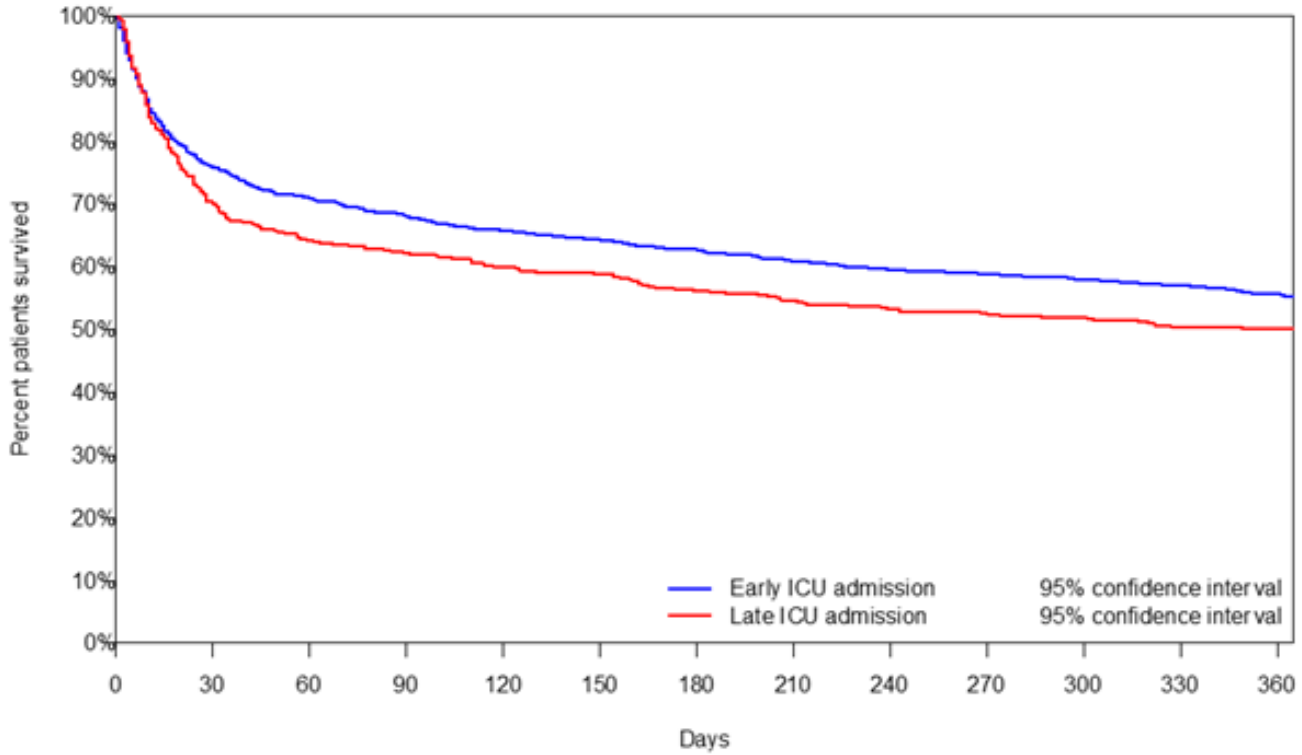

**e-Figure 4.** Stratified, multivariable Cox proportional hazards regression analysis assessing the impact of demographics, risk factors and comorbidities on mortality.

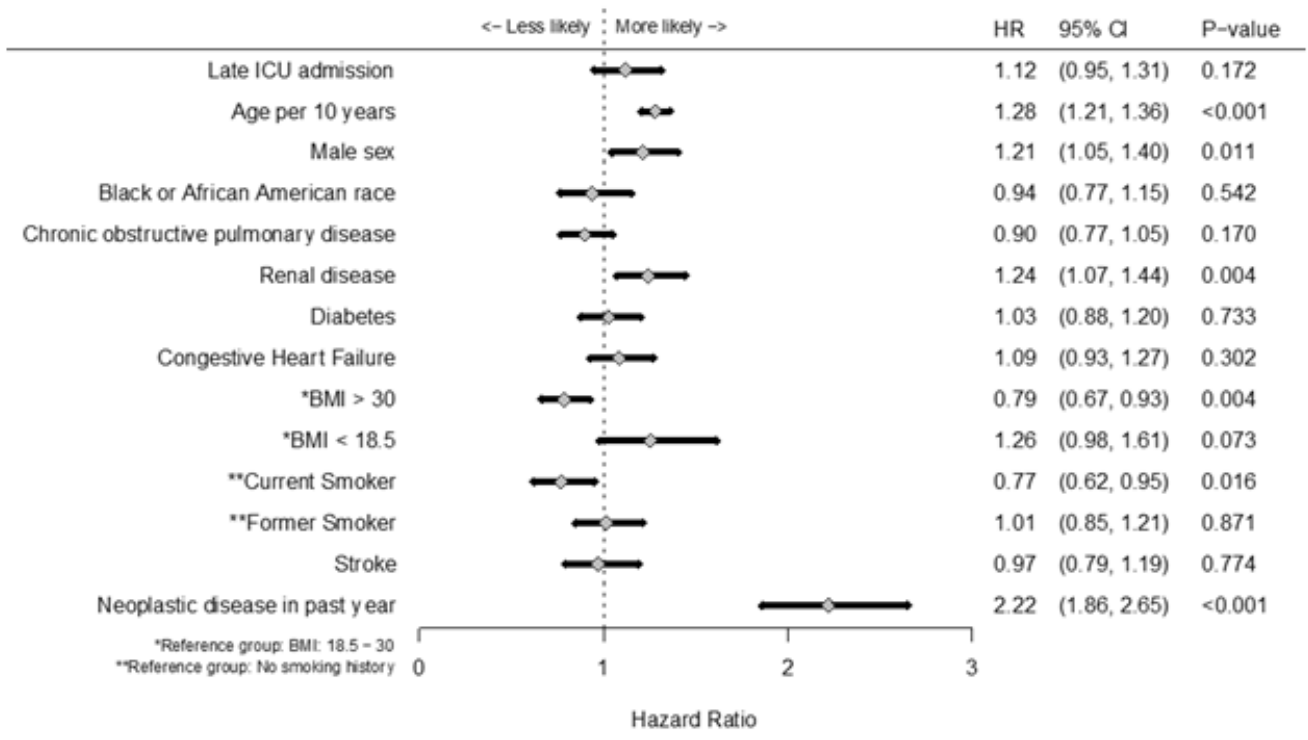

Supplement: mmc1.pdf [file mmc1.pdf]
